# Supplementary material for: Improved ELISA for linoleate-derived diols in human plasma utilizing a polyHRP-based secondary tracer
Source: Royal Society of Chemistry journal article supplement (doi:10.1039/d2ay00272h), 2022-01-01
Supplement: d2ay00272h1.pdf [file d2ay00272h1.pdf]

## **Supplementary Information for**

### **Improved ELISA for linoleate-derived diols in human plasma**

#### **utilizing a polyHRP-based secondary tracer**

Nalin Singh, Dongyang Li, Cindy B. McReynolds, Christophe Morisseau, Bruce D. Hammock\*

Department of Entomology and Nematology and UC Davis Comprehensive Cancer Center,

University of California Davis, Davis, California, 95616, USA.

\*E-mail: [bdhammock@ucdavis.edu](mailto:bdhammock@ucdavis.edu)

Tel: 530-752-7519

|                                                                                                                                                                      |       |
|----------------------------------------------------------------------------------------------------------------------------------------------------------------------|-------|
| Table of Contents                                                                                                                                                    |       |
| <b>Supplementary Information</b> .....                                                                                                                               | S1    |
| <b>Improved ELISA for linoleate-derived diols in human plasma utilizing a polyHRP-based secondary tracer</b> .....                                                   | S1    |
| <b><sup>1</sup>H NMR and HRESIMS for DiHOME standard</b> .....                                                                                                       | S3    |
| <b>Fig. S1 MS and UV-vis characterization of OLE-OVA (coating antigen)</b> .....                                                                                     | S3-S4 |
| <b>Table S1 HPLC gradient for elution of DiHOMEs</b> .....                                                                                                           | S4    |
| <b>Table S2 Q-TRAP mass spectrometer parameters</b> .....                                                                                                            | S5    |
| <b>Table S3 Tandem MS parameters for DiHOMEs</b> .....                                                                                                               | S5    |
| <b>Fig. S2 Checkerboard titration-based optimization of coating antigen (cAg) and primary antibody (PAb) concentrations (ppm) for DiHOME ELISA formats A-C</b> ..... | S6-S7 |
| <b>Fig. S3 Calibration curves (and IC<sub>50</sub> values) for DiHOMEs in varying concentrations (0-50% in assay buffer) of human urine</b> .....                    | S8    |

*Dihydroxyoctadecenoic acids* (regioisomer mixture).  $^1\text{H NMR}$  (400 MHz,  $\text{CDCl}_3$ )  $\delta$  6.25-5.96 (2H, broad singlet, **OH**), 5.61-5.54 (1H, multiplet (m), **vinyllic**), 5.47-5.40 (1H, m, **vinyllic**), 3.52-3.46 (2H, m), 2.38-2.27 (3H, m), 2.11-2.02 (3H, m), 1.69-1.59 (2H, m), 1.53-1.23 (16H, m), 0.90 (3H, triplet,  $J = 6.8$  Hz, **Me**); HRESIMS observed  $m/z$  313.2388  $[\text{M} - \text{H}]^-$  (calculated  $m/z$  for  $\text{C}_{18}\text{H}_{33}\text{O}_4^-$ , 313.2384).

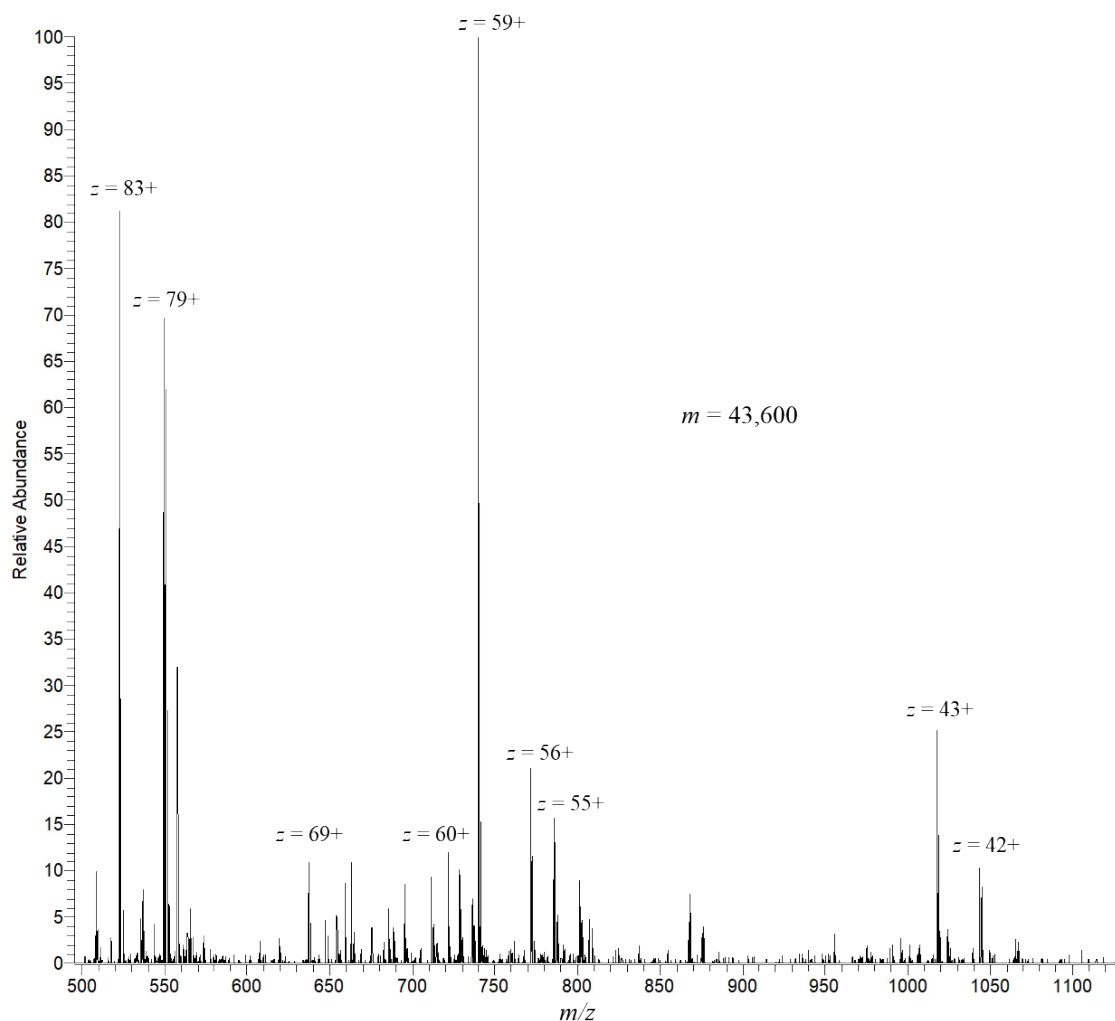

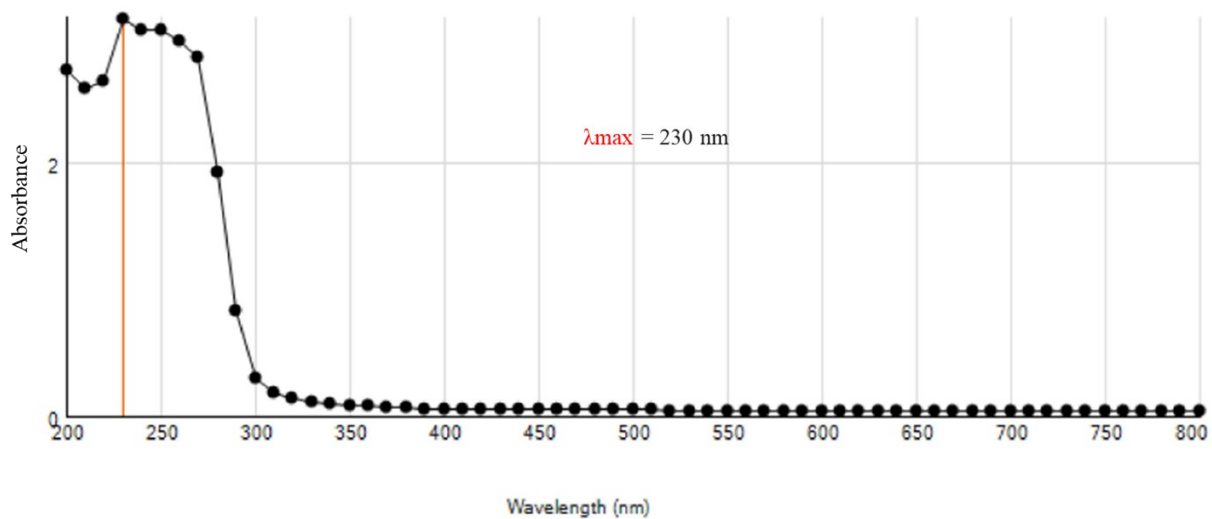

**Fig. S1** MS and UV-vis characterization of OLE-OVA (coating antigen)

**Table S1** HPLC gradient for elution of DiHOMEs

| Time (min) | B (%) |
|------------|-------|
| 0          | 20    |
| 1          | 70    |
| 5          | 95    |
| 6          | 95    |
| 7          | 20    |

**Table S2** Q-TRAP mass spectrometer conditions

| Parameter              | Value  |
|------------------------|--------|
| Curtain Gas (psi)      | 30     |
| Collision Gas          | Medium |
| IonSpray Voltage (V)   | -4500  |
| Temperature (°C)       | 450    |
| Ion Source Gas 1 (psi) | 50     |
| Ion Source Gas 2 (psi) | 50     |
| Interface Heater (ihe) | ON     |

**Table S3** Tandem MS parameters for DiHOMEs

| Analyte          | Declustering<br>potential<br>(V) | Entrance<br>potential<br>(V) | Collision<br>energy<br>(V) | Collision<br>cell exit<br>potential<br>(V) |
|------------------|----------------------------------|------------------------------|----------------------------|--------------------------------------------|
| 9,10-<br>DiHOME  | -50                              | -10                          | -30                        | -5                                         |
| 12,13-<br>DiHOME | -50                              | -10                          | -30                        | -5                                         |

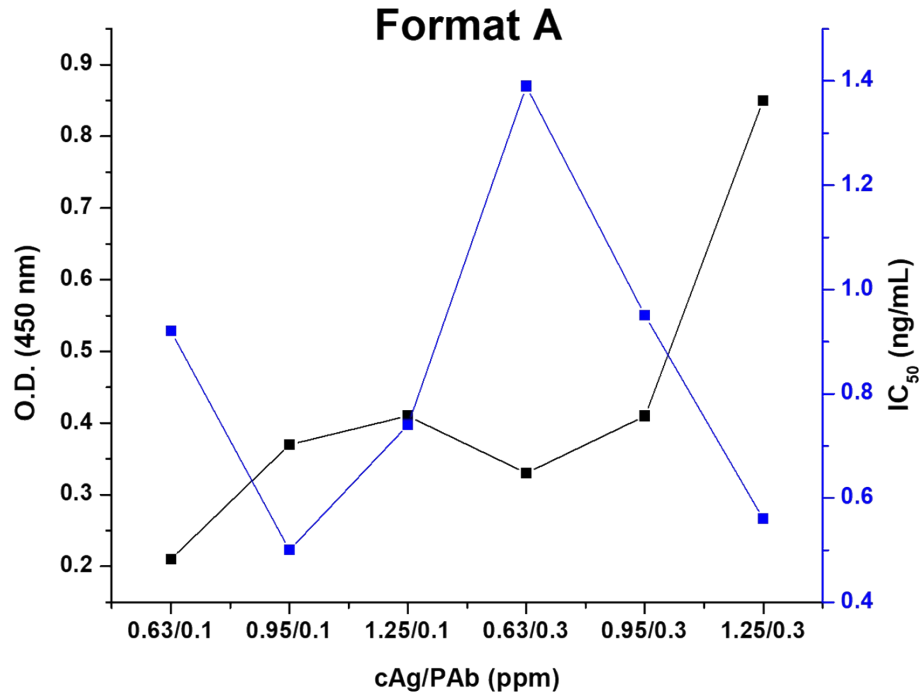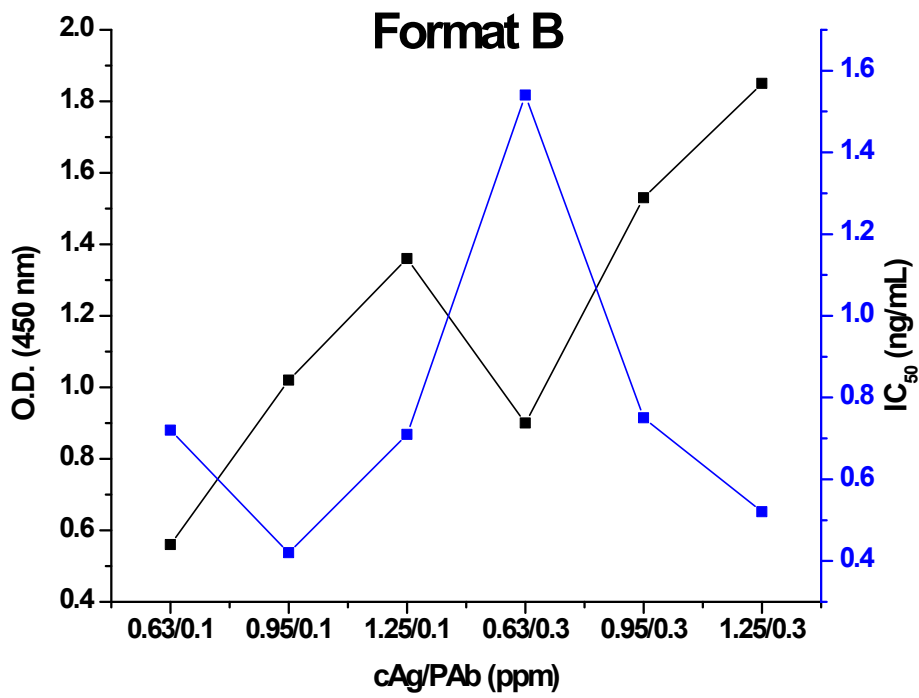

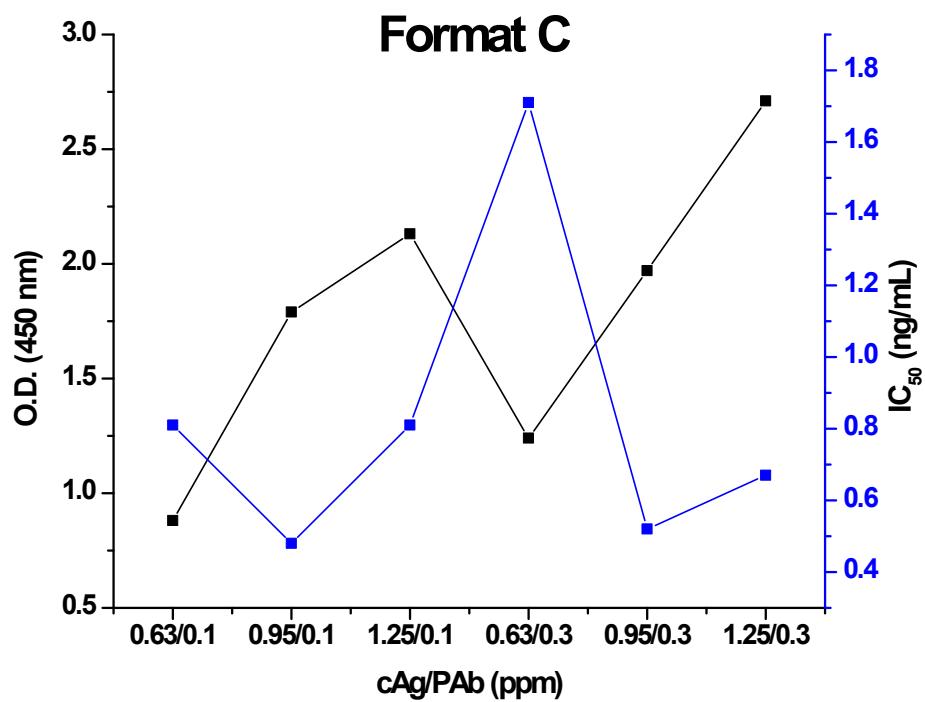

**Fig. S2** Checkerboard titration-based optimization of coating antigen (cAg) and primary antibody (PAb) concentrations (ppm) for DiHOME ELISA formats A-C

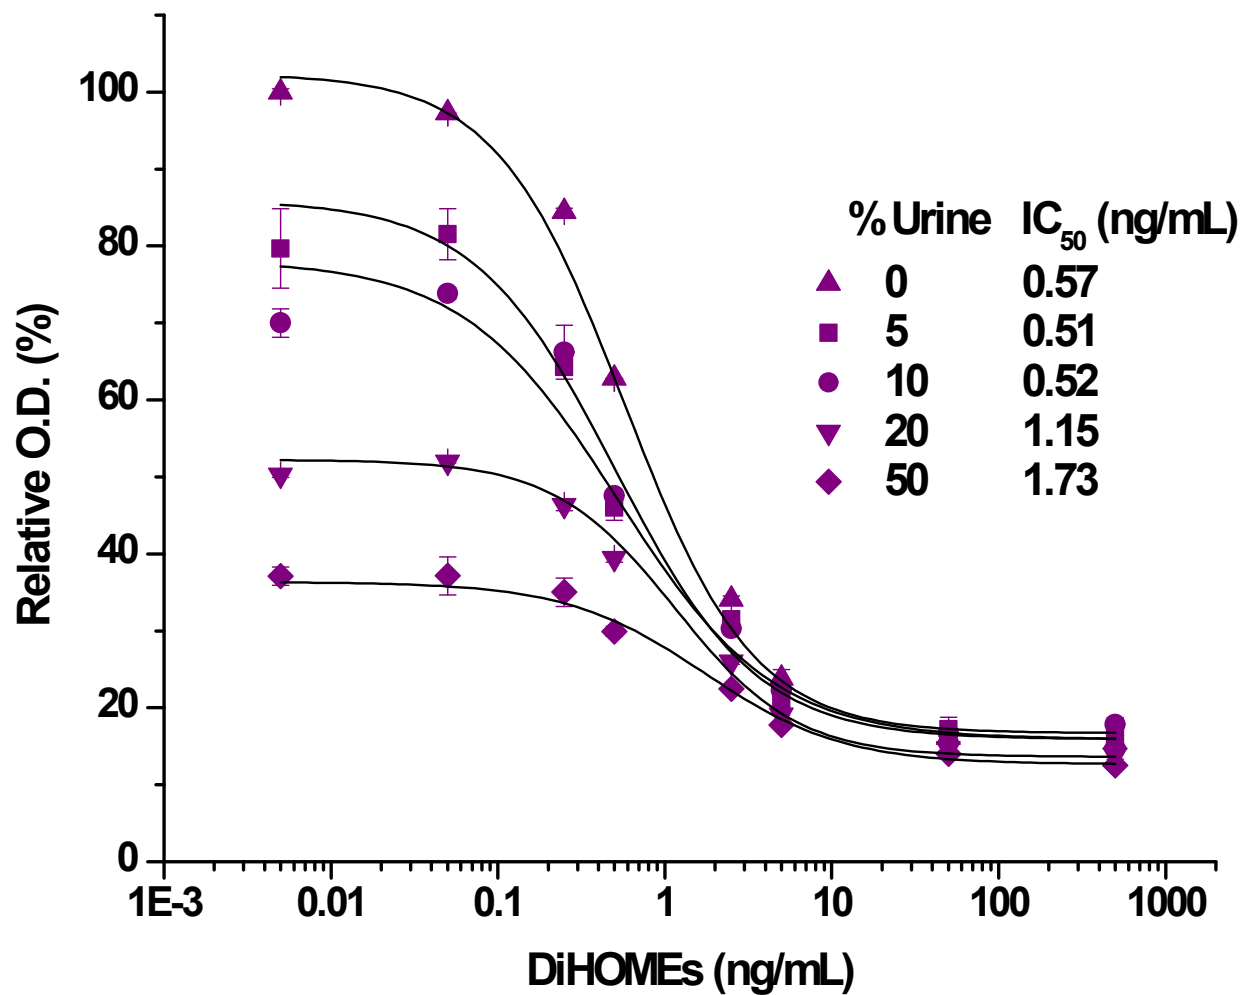

**Fig. S3** Calibration curves (and IC<sub>50</sub> values) for DiHOMEs in varying concentrations (0-50% in neat assay buffer) of human urine
